# Supplementary material for: An investigation of anthropogenic influences on hydrologic connectivity using stress tests
Source: Copernicus journal article supplement (doi:10.5194/hess-2023-243), 2023-10-18
Supplement: Supplementary file [file hess-2023-243-AC2-supplement.pdf]

## Reply to Referee 2

Answers to the comments in blue.

I have read this discussion paper with great interest. I do not doubt the science that went into this study. However, the way it is presented is rather unsatisfying. This feeling covers all aspects of the paper, specifically how the methodology and results are presented as well as the interpretation of results and conclusion.

We thank referee 2 for the feedback on our study. We acknowledge the need for improvement of the presentation of the methods, in particular a more detailed description of the model and model setup, and of the results. We suggest details below (and also in response to R1).

Overall I am a bit puzzled about how I should interpret this study. It starts off with a larger context. But, much more than a ‘very general, first attempt to model SW-GW interactions in the Dreisam valley (L422-424)’ it is not. I am questioning how much we learned ‘to help gain insights into factors to consider in future modeling studies’ (L424). What are these insights specifically and to what extent are the findings from this study transferable to other studies? (and is that not already done, for example, in the larger scale groundwater-surface water models available?).

We see that the phrasing of aims and insights and the discussion of transferability of the results are not clearly aligned. In the revised version we will clarify the local and general addressed knowledge gaps more clearly and better work out transferrable knowledge gain such as

- the introduction and usability of connectivity metrics in different hydrogeological contexts and for different seasonalities of the drying
- the potential to distinguish between climatic and human impacts on streambed drying using model stress test approaches
- the limitations of model approaches to simulate specific aspects of groundwater-surface water interaction

I regret there is no proper sensitivity analysis done of at least the most important parameter settings that impact the groundwater-surface water interactions. However, I do understand that this is probably not something the authors want to add to their analysis at this stage. I found all conclusions on uncertainties of the simulated leakage, because of the very limited model evaluation, somewhat hard to interpret. I have several points of concern:

Thank you for this comment. As already noted in the response to R1, we acknowledge that we used the term sensitivity not in the usual hydrological modelling terminology of a formalized (parameter) sensitivity analysis. We suggest we can change and clarify this in a revised version and respond to each of the specific points separately.

[1] **Model concept.** There are several aspects that I cannot fully understand. (L118) ‘We used a combination of..’; I am not sure what this means. Are the models coupled in a way, or does one model use the outputs of the other, or did you use a combination of model results of the analysis? Not clear.

The Modflow model uses recharge and runoff data simulated with the RoGeR model as an input (see L129-131). Thus, we used an offline coupled model approach here. For clarification, we will specifically mention this in section 2.2.

(L123-124) ‘Surface water fluxes, well extractions, and recharge are added in the form of boundary conditions’. How does this work in Modflow6? As far as I know, you have to translate surface water fluxes to heads and use it as a general head boundary in Modflow. To be able to calculate heads from fluxes there needs to be some calculations using assumptions on river depth and width. What was used here? For wells in Modflow, you can define this as a specific pumping rate or specific head. Recharge is probably used as an upper boundary and as an input flux. Is capillary rise considered as well? Not enough information is provided to understand how the Modflow model is built and how boundary conditions are implemented.

In Modflow6, the surface water fluxes, well extractions and recharge are added by means of the SFR-package, the well package and the RCH packages. Mathematically, the so called stress packages are boundary conditions (see Modflow6 documentation Langevin et al., 2017 chapter 6). In order to be more precise on this, we will specifically mention the packages used and refer to the Modflow documentation.

Capillary rise is not considered in Modflow but taken into account during the recharge calculation with RoGeR. In case of capillary rise recharge as the input flux for Modflow can also become negative

River depth and width are given in the streambed parameterisation. The data availability of these parameters is mentioned in L139/140.

The well package used in this study uses a flow rate/pumping rate for each well (see Langevin et al., 2017 chapter 6). Data for each well was available from the regional water supplier (see L110/111). We will add all this additional model setup information to section 2.2.

(L129-136): ‘the model’ is this referring to the smaller Dreisam model or the bigger model? ‘requires spatially distributed parameters determining’ what kind of parameters? Determining surface and subsurface flows so I am assuming soil parameterization, elevation etc but this is not mentioned anywhere. (L134): as the aquifers are unconfined (at least I did not read otherwise) does it make sense to use specific storage (neglectable of unconfined conditions) compared to specific yields? (L156-157) ‘based on Manning’: I think this needs a bit more explanation (or reference to the original code and/or coupling between surface and groundwater).

As the extension of the model is bigger than the Dreisam catchment (see previous L127-129), model input is required for the entire model domain. L129/130 should actually read: “The model requires spatially distributed parameters determining surface and subsurface flows as well as timeseries of runoff and recharge as an upper boundary condition” We regret this mistake and we will change the phrasing. The following lines (L130-135) explain the input parameters in detail. We will add information on topography, which is available from a DEM of approximately 30 m resolution.

We mentioned unconfined conditions in L126 but we will change the phrasing to make clear that we assume unconfined conditions in the model. For the simulation of GW flows, Modflow requires information on specific storage (L134-135) and specific yield. The

streamflow routing uses a continuity approach (water budget) and thus, Manning's equation is only used for conversion of streamflow to stream depths (L151-158).

(L142-158) A general remark for this whole section is that there is not a clear structure, especially not in this last part. It might help to show a small model conceptualization or flow chart: what goes in (parameterization, forcing) and what comes out (discharge, which is then used to calculate river heads), etc. I truly recommend going through this section again and making sure everything is very clear: which input data and where did you get it from, what is calculated in which model component, and how does it feed into the next model component? A proper understanding of the model setup is crucial to understanding and interpreting results as a reader (also, specifically as no sensitivity analysis is performed on any parameter settings. Then at least be clear and open on how you construct and parameterize your models).

We agree and think we can improve the clarity of model setup and workflow as part of a revision, possibly considering an additional schematic to the existing figure or it's improvement. Here we can point to the building blocks that are already in the text and that we can easily expand on in a revised version: The input and output data are mentioned in section 2.1. A conceptual figure of the model input and output is given in Figure 1. For the information about how river heads are computed from discharge we refer to L151-158 and the Modflow6 documentation (Langevin et al., 2017).

Some additional questions: the RoGeR model was at daily resolution, how about the groundwater model and the river routing? Same for spatial resolution? And vertical discretization of both the hydrological and groundwater models is also not that clear to me. Human interactions are implemented by groundwater extraction only. And is there a return flow to surface water and/or groundwater I cannot follow that either.

The spatial resolution of the GW model is 100x100m (see L129). RoGeR's spatial resolution is much higher as it runs separately for homogeneous polygons regarding elevation and soil parameters. Recharge and runoff for all intersecting polygons are summed for each grid cell to generate Modflow input data. We will add the missing information to the revised manuscript.

Modflow's vertical discretization comprises four layers. In L134, we describe the subsurface parameterisation data and mention the data source. Figure 1c) contains a cross-section of hydraulic conductivities and the vertical discretization along this cross-section.

In this study, GW extractions are the only human influences considered. We agree that there are other human influences, such as urbanisation, soil sealing, land use changes, or water withdrawals due to irrigation, which can also influence recharge, groundwater heads and interaction of groundwater and surface water. However, in our study catchment of river Dreisam groundwater extractions for drinking water supply is by far the most important human influence. To assess other factors, model stress test approaches, such as presented in this study, can be adapted accordingly in the future. For example, the Modflow6 drain package can also be used to implement agricultural drains and other stresses, which potentially modify the GW head. We will add discussion on this as an outlook in the discussion section.

Groundwater extractions are used for drinking water supply of the city of Freiburg, which is located downstream of the study area. Sewage plants for Freiburg are located downstream of our study area as well. Therefore, we can assume that there is no relevant proportion of return flow within our study area.

(L142-150) More generally, I have some trouble understanding the term ‘leakage’ in this study. As I understand it now, it is used here to describe groundwater drainage and river infiltration. For me, leakage would mean more the unintended movement or loss of groundwater from its natural subsurface flow and not the dynamic interaction between groundwater and surface water that changes due to groundwater pumping. Maybe the terminology is something to verify with a groundwater expert as well.

Thank you for this comment. The objective of this study was to simulate GW-SW interaction. In this study, leakage therefore refers to the exchange flow between GW and SW in this study. We agree that the use of the term “leakage” is probably not ideal. However, we used the term here for consistency with the Modflow documentation. If we keep the term, we will clarify this better.

[2] **Evaluation of model results.** Similar to the previous I have many questions. More in general I find it hard to understand what ZWL represents. A conceptual figure just showing a connected groundwater-surface water system and a disconnected system might already help.

We regret that the definition of ZWL is not clear. ZWL means, that the streambed is dry. This means, that an interruption of longitudinal connectivity takes place once ZWL occurs in a specific stream section. We will add this information in the beginning of the manuscript.

The direction of GW-SW-interaction depends on the relationship of vertical (leakage direction) and longitudinal connectivity (ZWL). We did not provide a conceptual figure here as we explained this in L182-186. The relationship of leakage direction and ZWL is additionally displayed in Figure 5. We will revise the description and legend of this figure to make this more clear to the reader.

Another more general comment, in the writing you write ‘validation’ while the heading reads ‘evaluation’. Reading this section I am wondering if validation should not be replaced by evaluation in this section. L166: ‘We preselect a set of stations’ How did this pre-selection go, or is that what is described next? (if so then use something like ‘to this end’ instead of ‘hereby’). (L167-170) I cannot follow this. L172: ‘calibrated’: there was nothing on a calibration before.

Thank you for this comment. We will change the term “validation” to “evaluation”. Here, the pre-selection of stations refers to the stations with good agreement of observed and simulated ZWL percentage (percentage difference < 15%). We agree, that this is misleading as we show longitudinal connectivity for all stations in Figure 4 and later on, we use other criteria (direction change to zero leakage and ZWL occurrence) for the evaluation of the relationship of vertical and longitudinal connectivity. We will therefore change this passage.

The term calibration was used in L172 with respect to the determination of the zero water level threshold. In order to avoid misinterpretation we will change the phrasing.

[3] **Stresstest scenario definition** It is not completely clear what goes into the first stress ‘changes in groundwater recharge’. Is this driven by climate input only or also by varying soil parameterization? I found the use of scenario somewhat misleading as ‘scenario’ refers to projections and potential future and the analysis is on the recent past (or current climate). So analysis or assessment might be a better term. Check throughout the manuscript how you refer to these tests. I also read the stress test (without scenario) this heading can then also read the stress test definition.

Thank you for this comment. We acknowledge that using both terms can be misleading. Thus, we will replace the term “scenario” in the manuscript and change the heading to “stress test definition”. Regarding the distinction between stress tests and scenarios, we refer to Hellwig et al., 2021: “Unlike climate change scenarios which provide probabilities of changes based on specific projection assumptions, scenario-neutral stress tests explore the systems’ general responsiveness, e.g. to other environmental changes or to extreme events. Therefore, stress tests must not be interpreted as predicting future conditions but rather as providing information on system responses for management or adaptation planning.”

[4] **validation of zero water levels.** The first finding is that simulated groundwater levels (heads or depths?) are underestimated (too deep or too shallow?) but that this does not impact simulated discharge. The underestimation has to do with the parameterization of the river bed. It is not clear which part of the parameterization is impacting the results. Probably the drainage level (aka the boundary condition) is meant here as the river bed resistance (for example) does not impact groundwater heads that much. Results are not well explained here. More in general in the result section (here and other parts) there are several parts that are redundant and describe methods instead of results, for example :L216, L223-226. L279-271.

Thanks for pointing out redundancies, which we will remove in a revised version. Also, we see that some of the sentences are too complex with unclear reference. Observed mean GW heads are represented in the model (L222). However the assessment of how good a performance this is, is not straightforward as the reference run is an assumed natural condition for which no observations exist, and the inclusion of the drinking water extractions while it is based on real data, those do not represent all groundwater extractions in the entire valley.

Water levels in the river are underestimated. We will check the phrasing in L213-226 in order to avoid misunderstandings and provide more clarity on any comparisons.

[5] L250: ‘leakage’ is the same as ‘leakage flow’ that was used before in this Alinea. And can you explain why simulated leakage flow is highly uncertain for areas with increasing flows? How did you evaluate the level of uncertainty? L252 “Which conditions they may change’ only considering limited model choices of groundwater pumping and recharge right?

In L250, we write that simulated leakage flow is highly uncertain at the borders of the alluvial valley aquifer as there are abrupt changes in the hydrogeology and topography causing strong changes of the water table slope. This is visible in the appendix in Figure A3. In L250, “A3” should be in brackets “(Figure A3)”. We are sorry for this mistake and will change this. We will also replace the term “conditions” here to clarify, that we refer to physiographic characteristics, such as slopes, topography and the location (upstream, downstream) itself.

[6] **Figure 4:** I do not fully understand this figure. What do the violins represent? Green is the reference (and not a green dot) and orange is the well scenario (and not an orange box) (see legend). What are the percentiles representing? What is the threshold? Where do ‘losing’ and ‘gaining’ come from? I can understand this but throughout the whole methodology and result this terminology was not used (but positive and negative leakage).

We regret this legend error and will change the legend.

The threshold is the location-specific threshold determined for zero leakage. This is mentioned in the following section 3.2.3 in L271-273. In the previous lines (L266-271) we

explain the terms ‘losing’ and ‘gaining’ conditions. For better understanding and readability, we will move this explanation to section 3.2.2

[7] L335-344: I disagree with the argument for not doing a sensitivity analysis. Also for a general interpretation of the result a sensitivity analysis, and varying parameter settings of a few key parameters, would have been useful to better understand what we learn from this modeling experiment (for example look at what is done in large-scale modeling studies). Also, I am a bit skeptical about the ‘reduce calculation times’ argument. How long does your model run the calculation times do not increase in when you re-run your model for different parameter settings, it is just more work. I would strongly recommend to rewrite your argumentation for not doing a sensitivity analysis or simply don’t bother to explain.

We agree and also refer to our reply to R1. A model sensitivity analysis of varying parameter settings would indeed be useful to further investigate model uncertainties.

We agree, that the calculation time alone does not explain why we did not do a sensitivity analysis. An entire model sensitivity analysis would require changes of several parameters, which interact with each other. This effort would be worth a study of its own. The focus in this study however, was on stress tests responses towards different types of stresses. We will elaborate this further, as already suggested in our reply to R1.

Minor comments

[8] L105-107. In this sentence, it is not clear if ‘baseflow’ is the groundwater that is released to the stream or the constant flow in a stream that comes from the gradual release of groundwater. Also, what follows is confusing ‘the degree of connectivity’; connectivity of what? Also, this suggests you discuss the groundwater discharge to the stream that contributes to rivers’ baseflow. I recommend being as clear as possible on the terminology, and baseflow is a difficult term.

In the study by (Ott and Uhlenbrock, 2004) baseflow is the slow runoff component. Here, we mean the degree of connectivity between groundwater and surface water. This will be specified.

[9] **writing in general.** I recommend an English language check to correct grammar and common writing mistakes. For example, linking sentences together with ‘and’ where the start of a new sentence would be preferred; referring to previously mentioned aspects with ‘this’ or ‘these’ where it is not always clear where it refers to; misuse of commas and often no use of comma’s where comma’s are needed for the readability. Sometimes the meaning of the sentence also completely changes when a comma is not placed (I had the read some sentences several times to understand a comma was missing). The level of the manuscript will increase significantly if the writing is improved.

Thank you for this comment. We will revise the manuscript with respect to the English language.

L128: To represent both the surface and surface systems

Will be changed.

L123: well extractions à groundwater extractions

Will be changed.

L127: “The extension of the model domain”à the first part is confusing: the model domain covers.

Will be changed.

L129 ‘< comma> as well as’

Will be changed.

L131-133: ‘The percolation ... ‘: a clear example where commas should be placed or new sentence should start as now it reads as if you sum up recharge and the sum of interflow and overland runoff.

Will be changed.

L133: ‘time invariant’: constant or static is a more common way of writing.

Thankyou for the suggestion. We will consider to change the term.

L160-161: leave this out.

Will be changed.

L162: A direct validation is not possible

Will be changed.

L164: If I understand it correctly you compared observed water table heads and streamflow to simulated values. Thus, ‘negative outliers of stream stages .... For gw heads far below the surface only concerns the simulated values? Not clear from the writing.

Yes, this concerns only the simulated values. The phrasing will be changed.

L245 is slightly *more* positive (*meaning* leakage in the natural system is lightly *higher*)

Will be changed.

L255-256: to stay consistent with the unit provided for the area. Also, a unit for leakage flow and specific leakage should be given.

We will add the units for specific leakage (mm/d) and leakage flow (m<sup>3</sup>/d) to the text. Units are provided in the respective Figures (Figure 3 and Figure 4).

L257 (setting the min.... ); I do not understand this. Is L271 similar (I can understand the latter).

L 257 explains how we normalized leakage. The brackets in L271 are thus a repetition and can be removed.

L274 modelled à simulated.

Will be changed.

L318: is it, not the other way around? Because of the resolution of your modflow model, you are not able to represent your drainage at a level of detail needed to accurately estimate the infiltration of losing streams. Which results in an underestimation of groundwater heads (or overestimation of depths).

Yes, exactly. The model resolution is too coarse, which is what is also explained here.

L321-327: this section hints at a hillslope effect but does not explain anything. (it turns in circles).

This section aims to express that uncertainties of simulated hillslope contributions could be a cause of the underestimation of zero water levels at upstream locations. We will change the phrasing.

L328: are weirs and bridges impacting the river bed to such an extent that it will impact your modeling more than, for example, the parameterization you use for riverbed conductance and the uncertainty related to that?

Weirs and bridges in the catchment area can significantly affect riverbed depth and slopes locally in a stream section. In addition, concrete basement of such structures can also impact riverbed conductance. Therefore, another potential source of uncertainty arises if such structures are neglected.

L332: not ‘would be’: a sensitivity analysis will be meaningful (and will be needed to properly interpret the modeling exercise.

Will be changed to “will be”

L427 “modeled leakage”

Will be changed.

L430: I have read this before, but here it says ‘Due to the uncertainties we are not able to investigate the change in the magnitude’. Of course, you can study the changes in magnitude. You are not able to fully interpret the results, not because of the uncertainties but because of the lack of sensitivity analysis and/or observed or more reliable modeled data.

Will be changed to “we were not able to interpret the change in the magnitude”
